# Supplementary material
Source: PubMed Central journal article supplement (PMC6104642)
Supplement: NIHMS982533-supplement-Fig__S1.pdf [file NIHMS982533-supplement-Fig__S1.pdf]

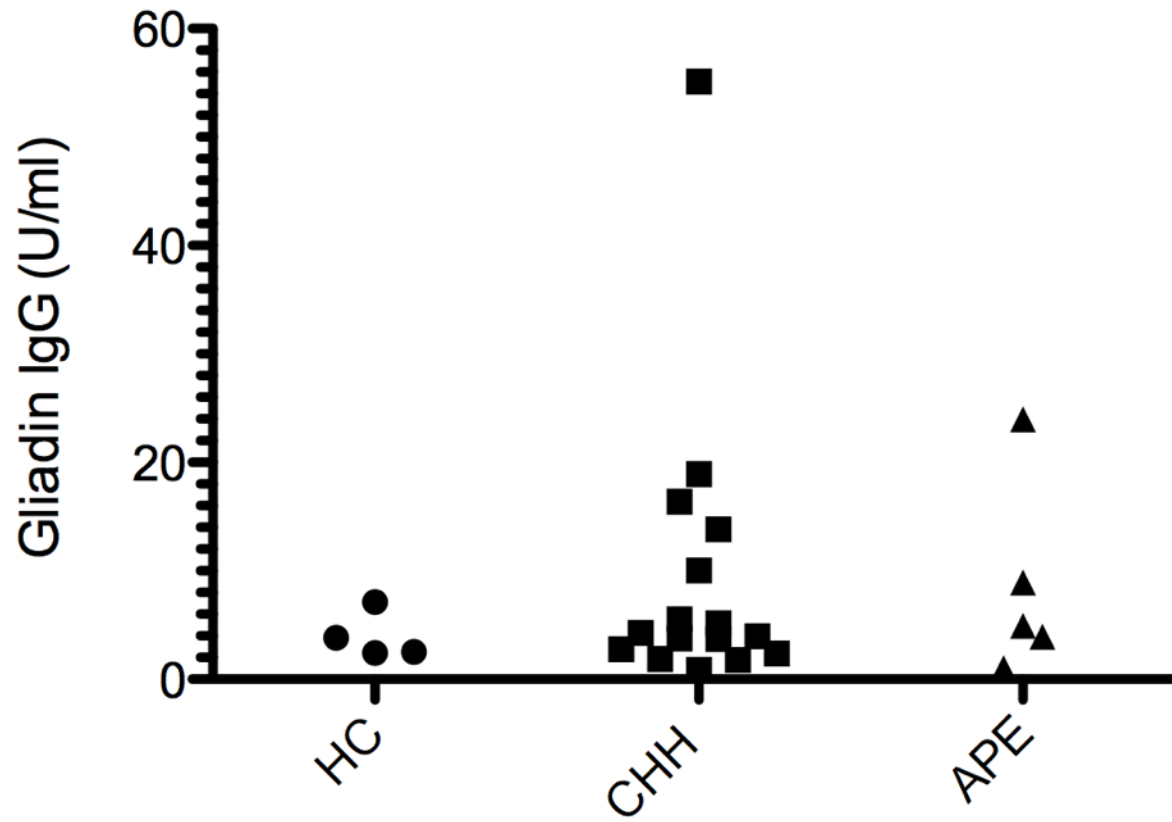

Figure S1. ELISA of anti-Gliadin IgG antibodies in patients with CHH and APECED compared to healthy controls.
