# Supplementary material
Source: PubMed Central journal article supplement (PMC6104642)
Supplement: NIHMS982533-supplement-Table_S1.pdf [file NIHMS982533-supplement-Table_S1.pdf]

Table S1: Patient Characteristics

| Patient ID | Age (years) | RMRP Mutation | Recurrent or severe infections | Atopic Disease | GI Manifestations                             | Joint Symptoms | ALC (cells/ $\mu$ L) | CD3+ (cells/ $\mu$ L) | CD19+ (cells/ $\mu$ L) |
|------------|-------------|---------------|--------------------------------|----------------|-----------------------------------------------|----------------|----------------------|-----------------------|------------------------|
| CHH004     | 39          | 70A>G/70A>G   | +                              | +              | -                                             | -              | 1520                 | 770                   | 170                    |
| CHH009     | 69          | 70A>G/70A>G   | +                              | +              | -                                             | -              | 1310                 | 960                   | 90                     |
| CHH012     | 26          | 70A>G/262G>T  | -                              | +              | -                                             | -              | 940                  | 810                   | 40                     |
| CHH016     | 63          | 70A>G/70A>G   | +                              | +              | -                                             | +              | 2010                 | 1550                  | 190                    |
| CHH017     | 51          | 70A>G/70A>G   | -                              | +              | + Gastritis                                   | +              | 1450                 | 950                   | 160                    |
| CHH019     | 28          | 70A>G/70A>G   | -                              | +              | + Lactose intolerance, digestive difficulty   | -              | 1700                 | 1540                  | 230                    |
| CHH020     | 23          | 70A>G/70A>G   | +                              | +              | + Bloody diarrhea of unknown etiology         | -              | 940                  | 450                   | 120                    |
| CHH023     | 59          | 70A>G/70A>G   | +                              | +              | + Constipation                                | -              | 1010                 | 630                   | 30                     |
| CHH029     | 63          | 70A>G/70A>G   | +                              | +              | + Oral aphthous ulcers, abdominal pain        | -              | 1190                 | 1110                  | 140                    |
| CHH033     | 65          | 70A>G/262G>T  | +                              | +              | -                                             | -              | 2010                 | 1360                  | 120                    |
| CHH035     | 45          | 70A>G/70A>G   | +                              | -              | -                                             | +              | 1500                 | 1250                  | 110                    |
| CHH037     | 23          | 70A>G/70A>G   | +                              | -              | + Lactose intolerance                         | -              | 640                  | 500                   | 100                    |
| CHH043     | 58          | 70A>G/70A>G   | +                              | -              | -                                             | -              | 1250                 | 590                   | 90                     |
| CHH079     | 37          | 70A>G/70A>G   | -                              | -              | + Occasional loose stools of unknown etiology | -              | 2220                 | 1910                  | 270                    |
| CHH100     | 44          | 70A>G/70A>G   | +                              | +              | + Diarrhea                                    | -              | 1180                 | 630                   | 130                    |
| CHH130     | 32          | 70A>G/70A>G   | +                              | +              | + Intestinal discomfort with certain foods    | -              | 1160                 | NT                    | NT                     |

NT = not tested
